# Supplementary figures and images for: How well are aerosol-cloud interactions represented in climate models? Part 1: Understanding the sulphate aerosol production from the 2014–15 Holuhraun eruption
Source: Copernicus journal article supplement (doi:10.5194/egusphere-2023-619), 2023-04-25

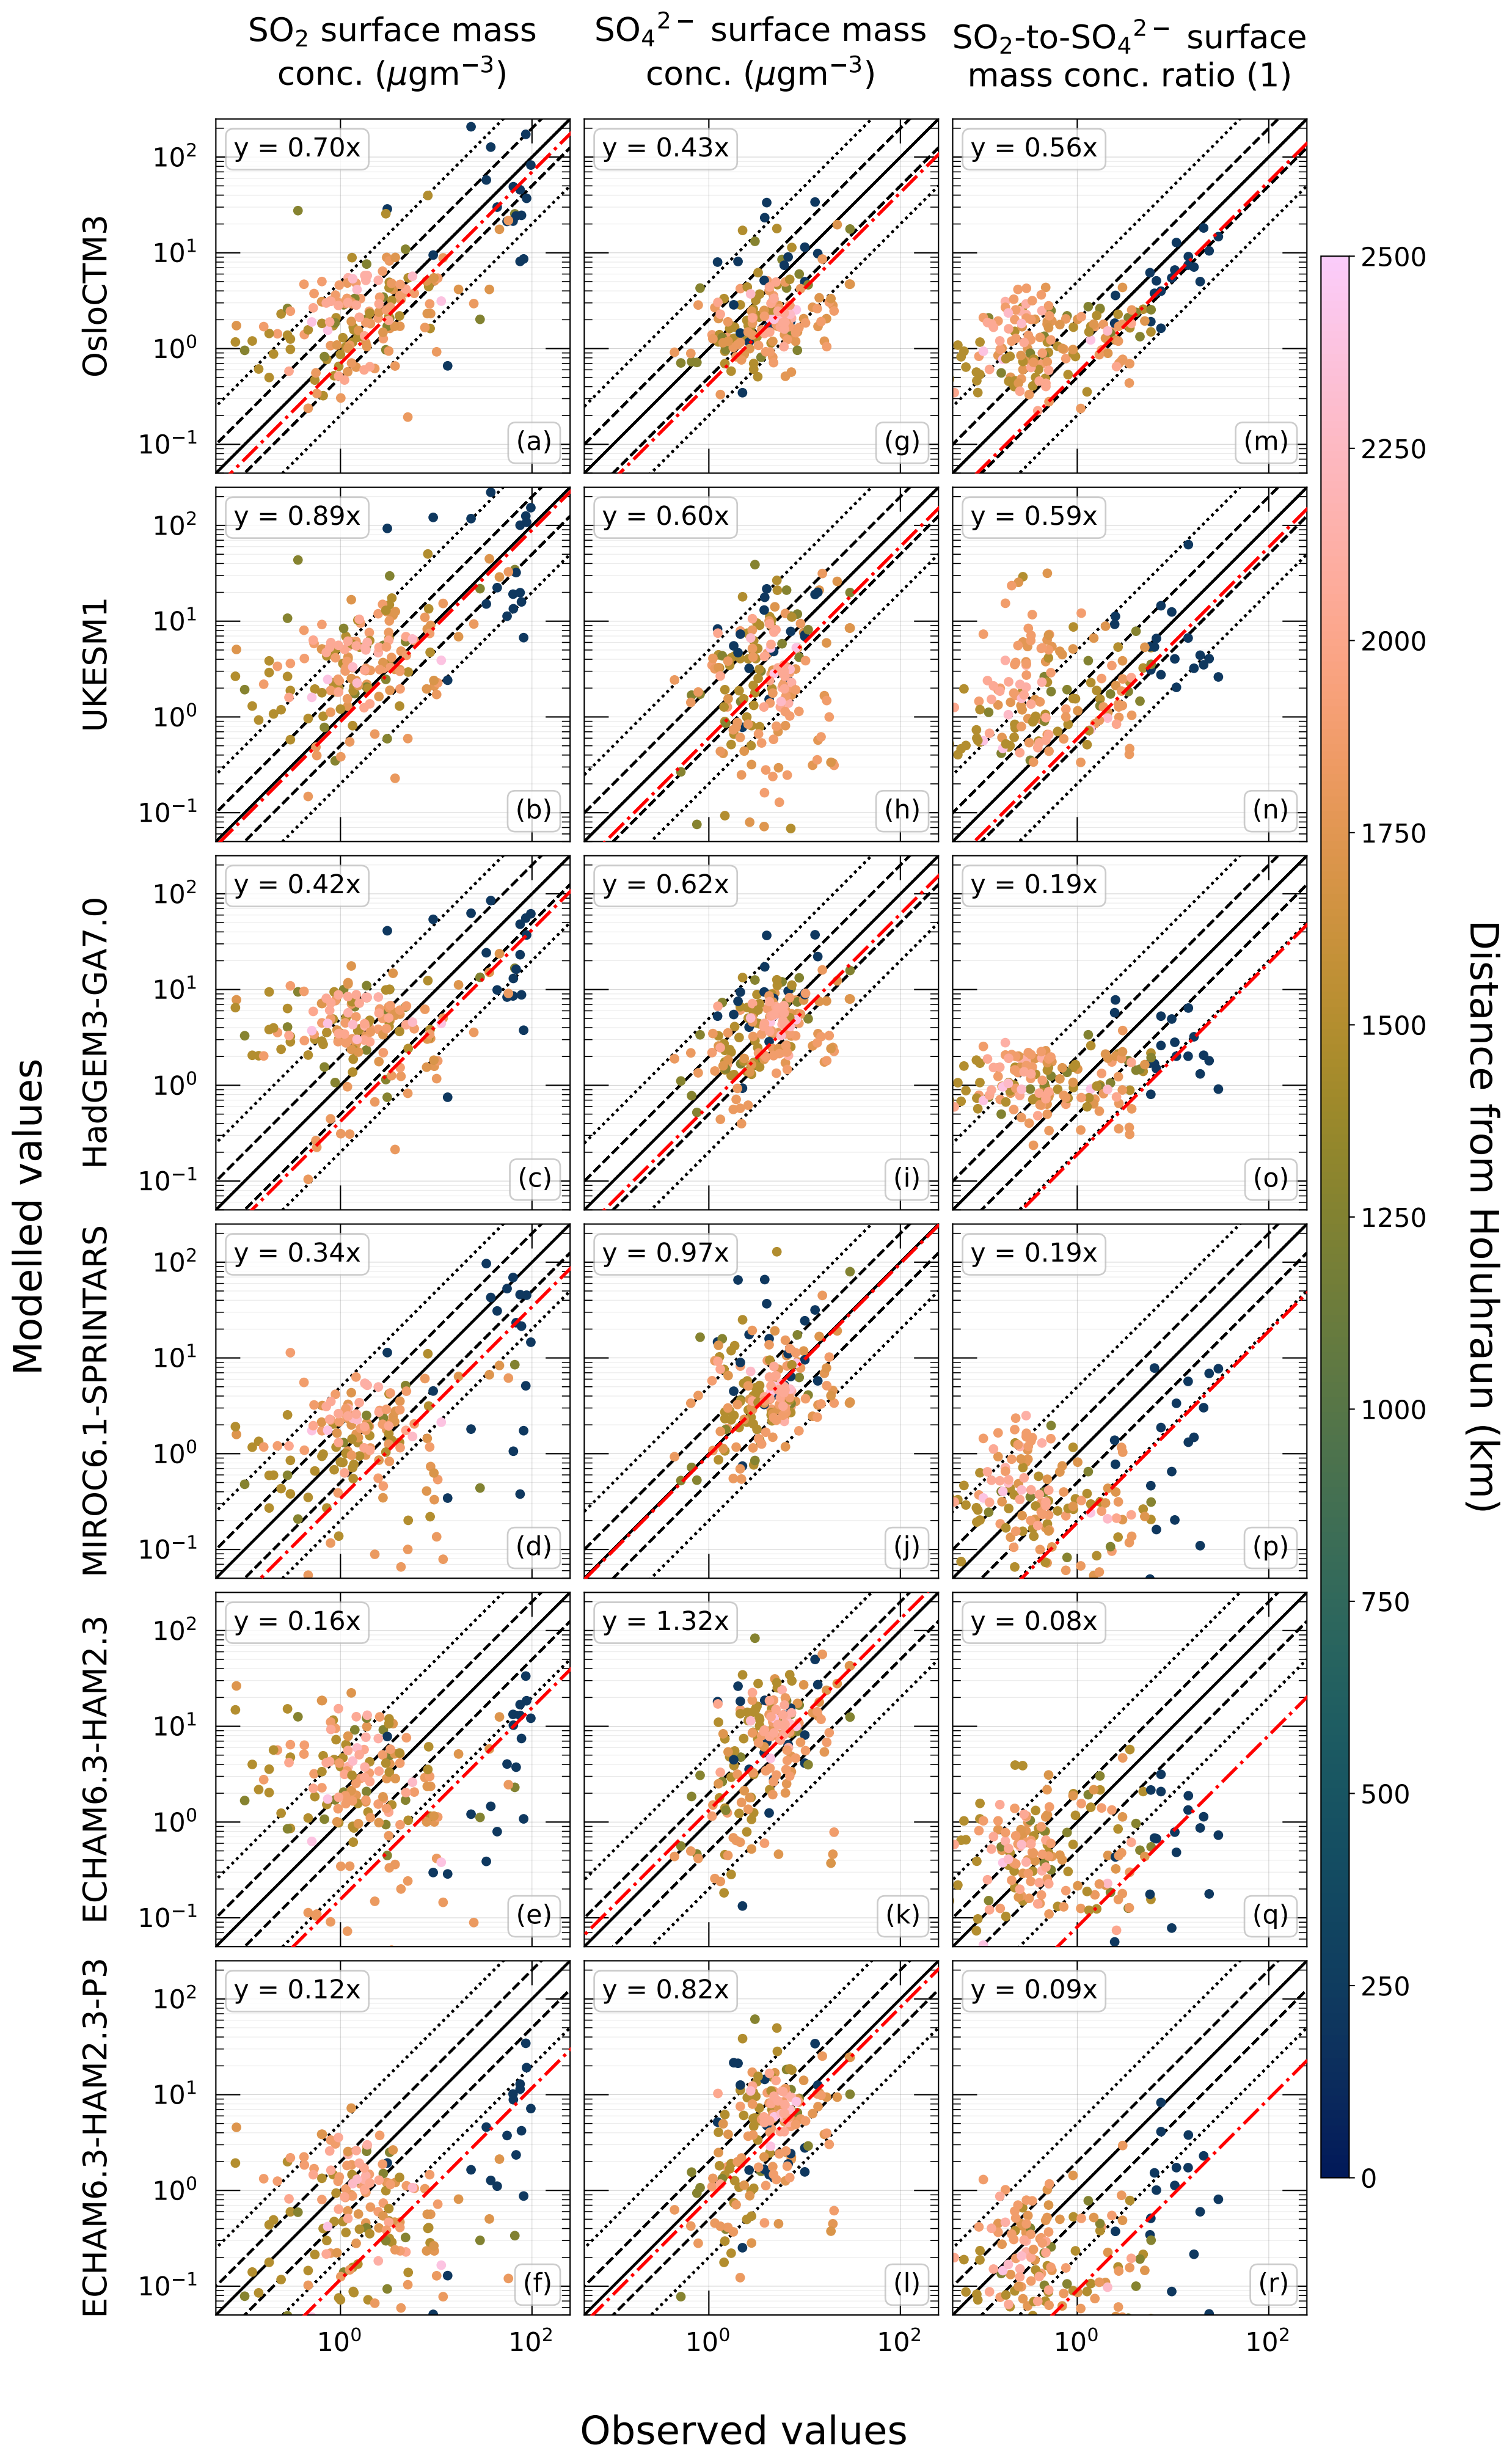

Supplement: Supplementary file 1 [file egusphere-2023-619-supplement.zip]

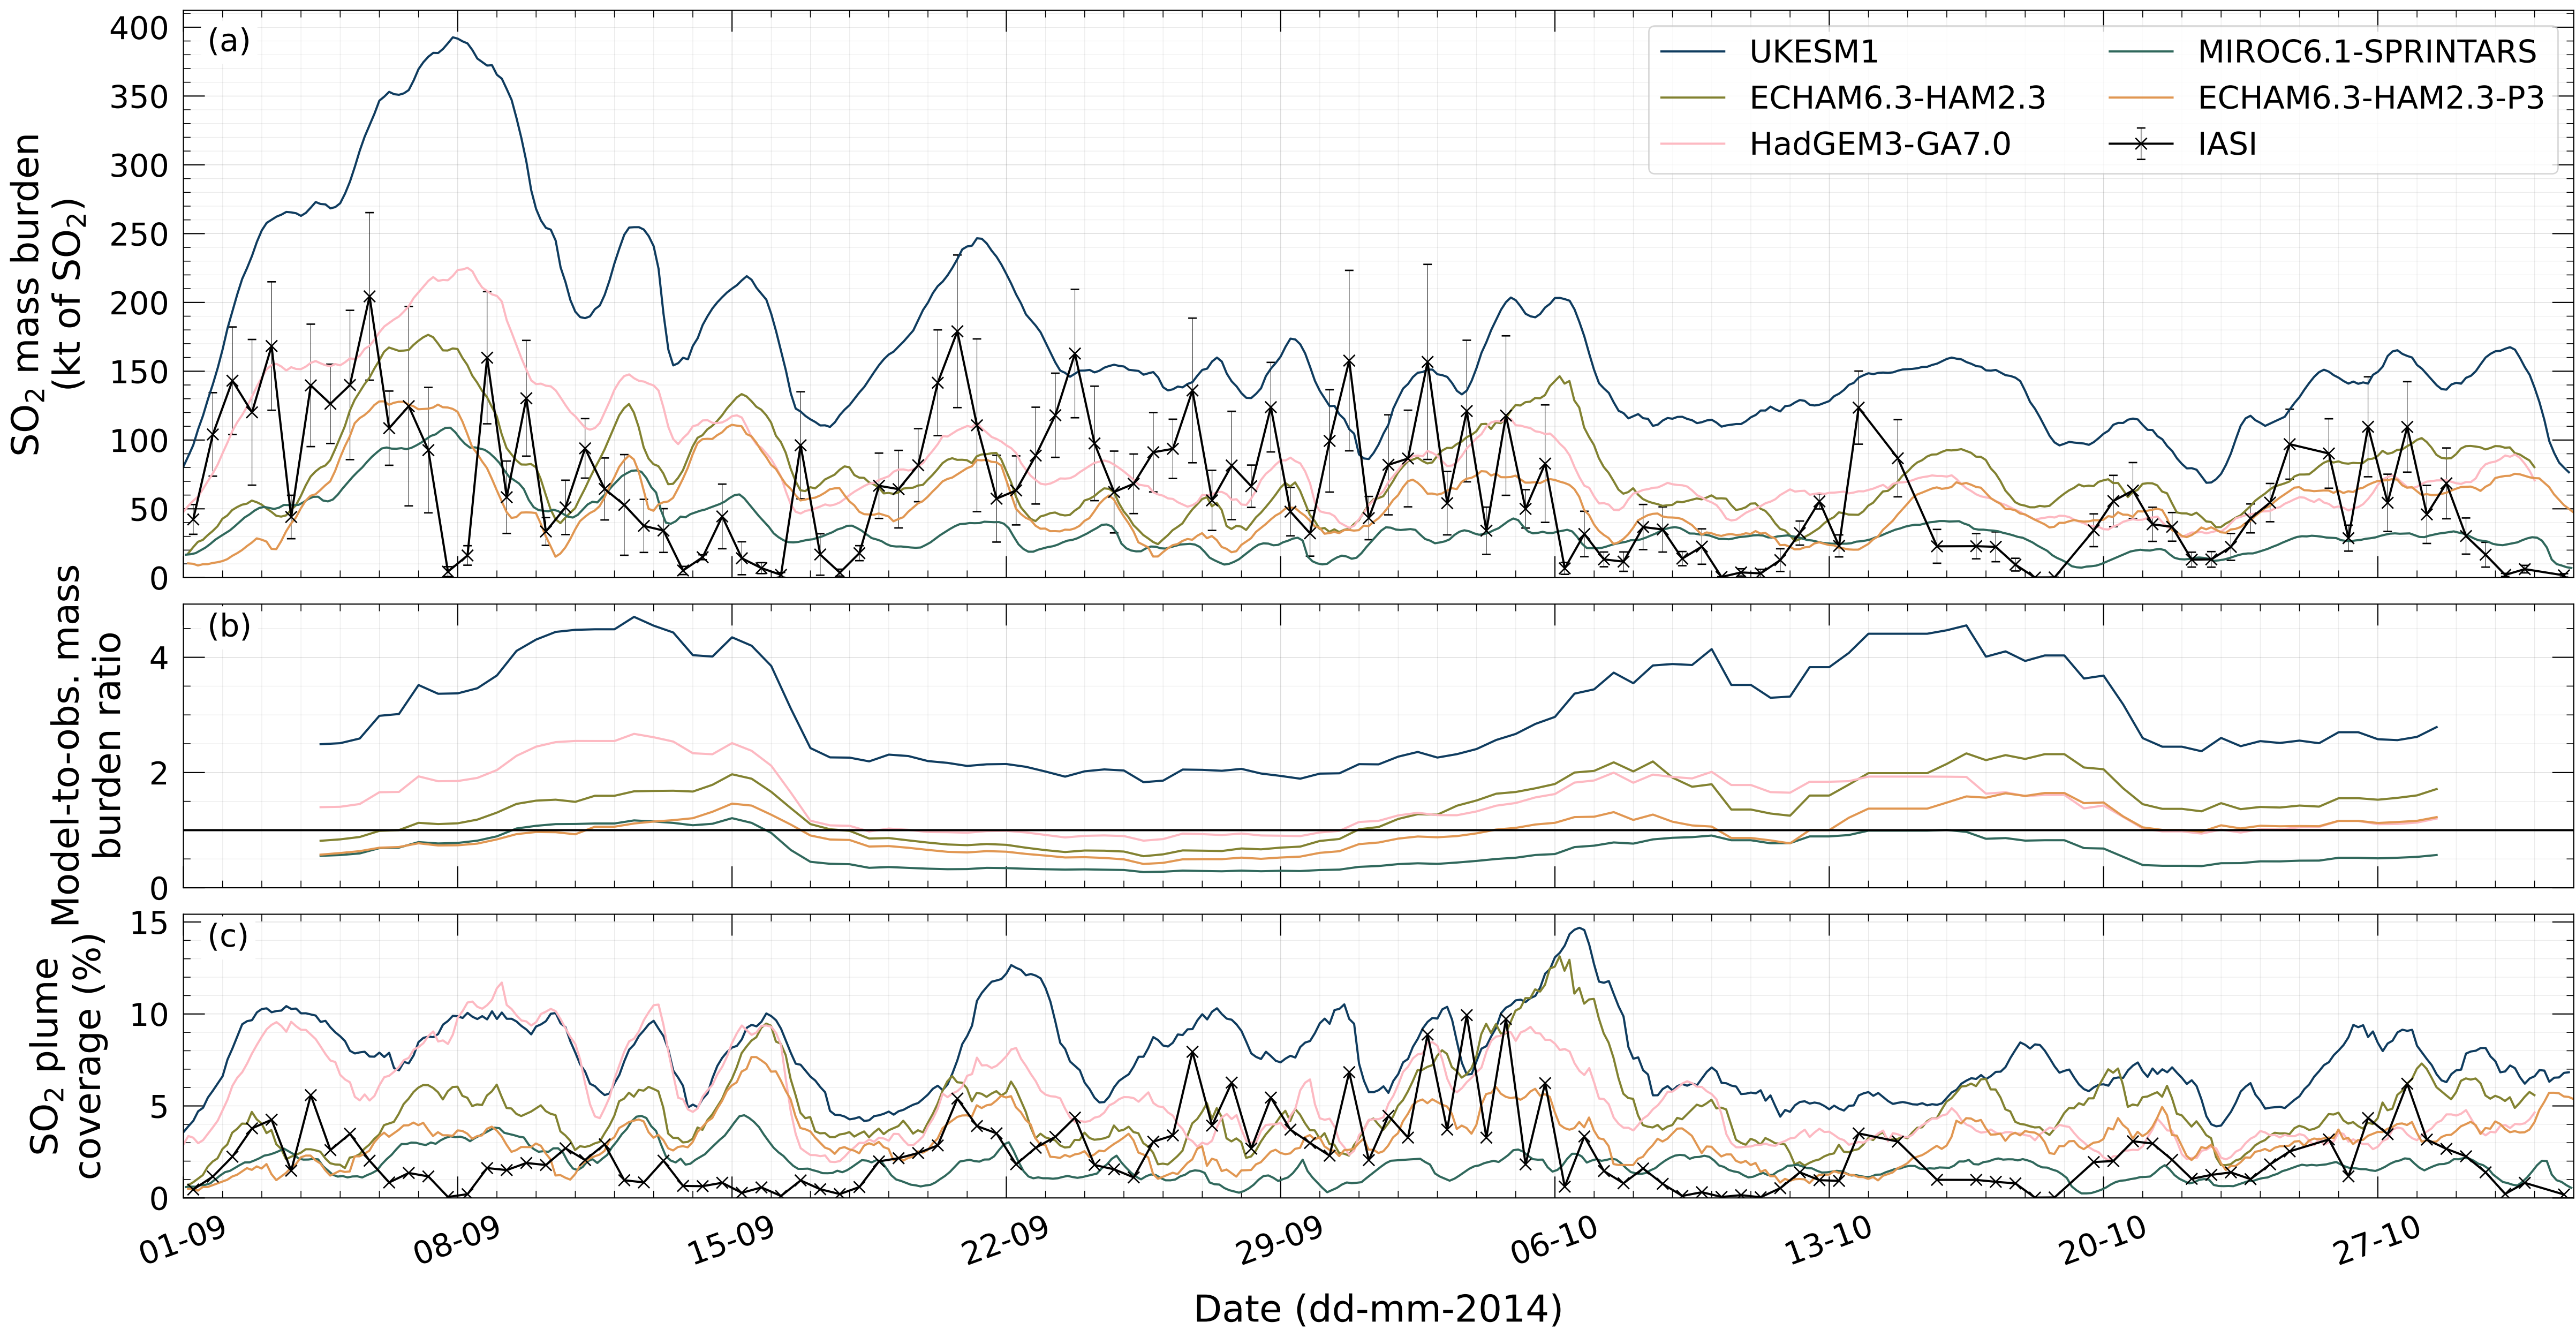

Supplement: Supplementary file 2 [file egusphere-2023-619-supplement.zip]

$\text{SO}_2\text{-to-SO}_4^{2-}$  surface mass concentration ratio

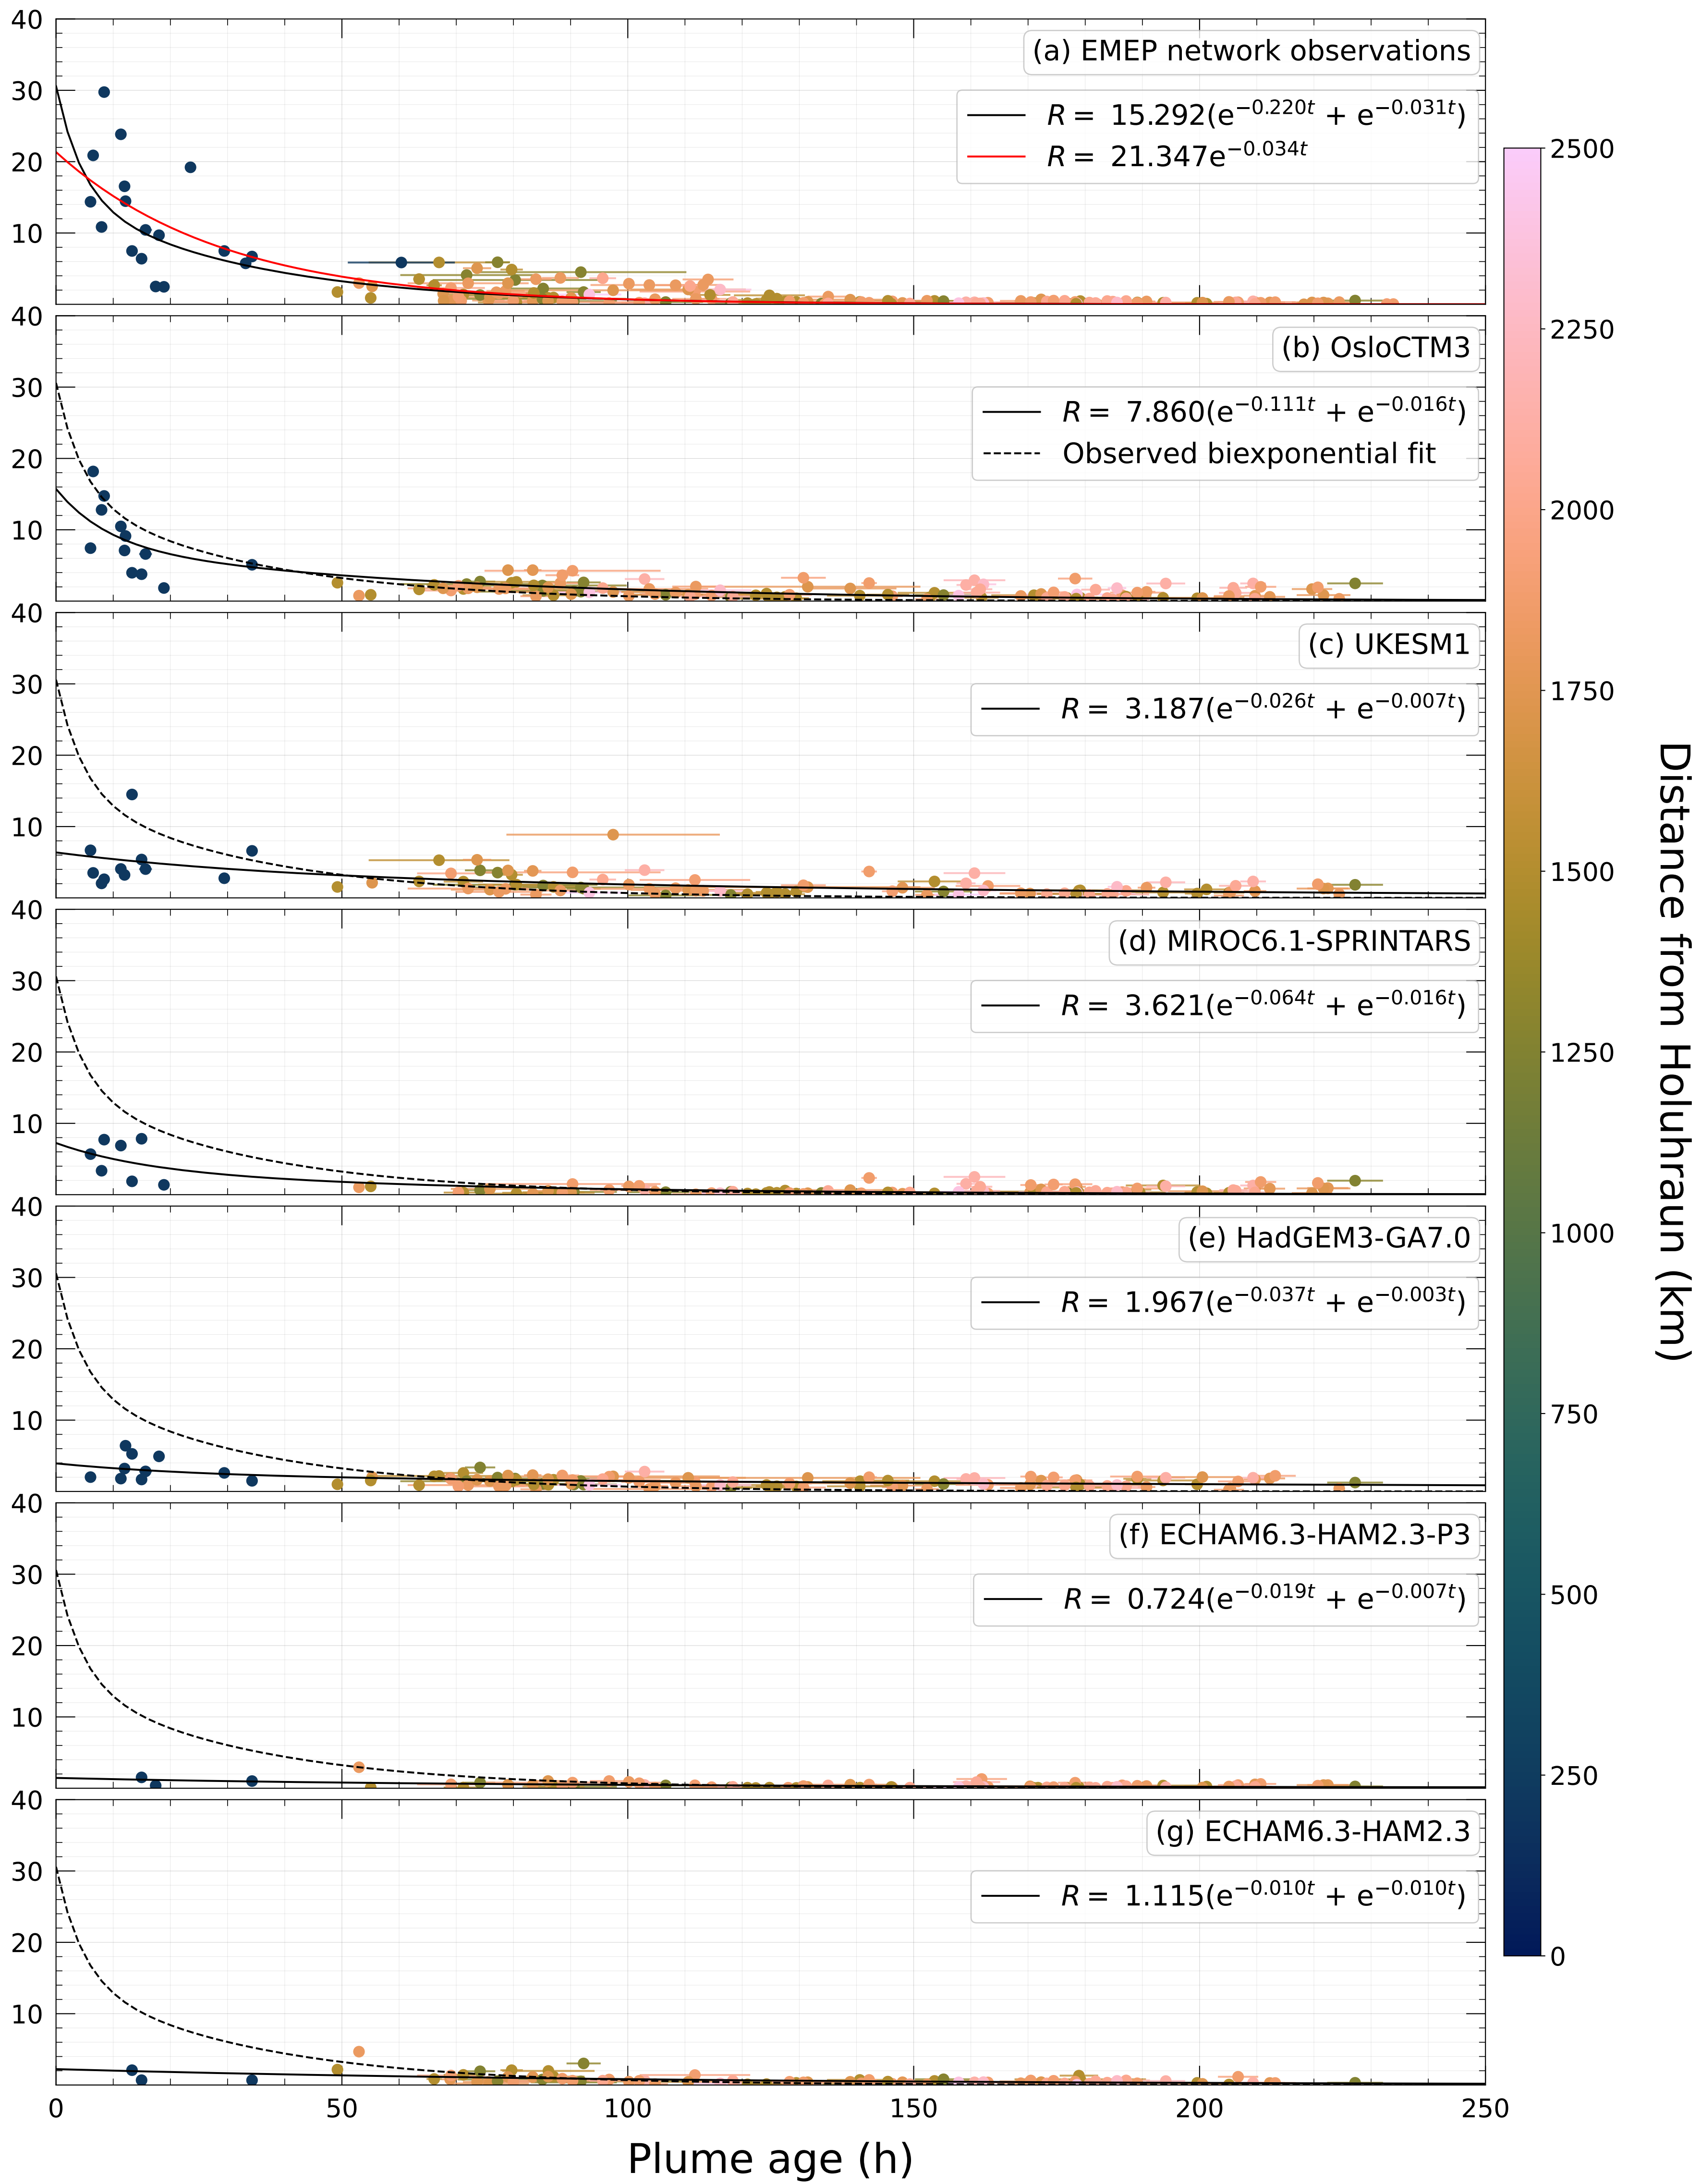

Supplement: Supplementary file 3 [file egusphere-2023-619-supplement.zip]

$\text{SO}_2\text{-to-SO}_4^{2-}$  surface mass concentration ratio

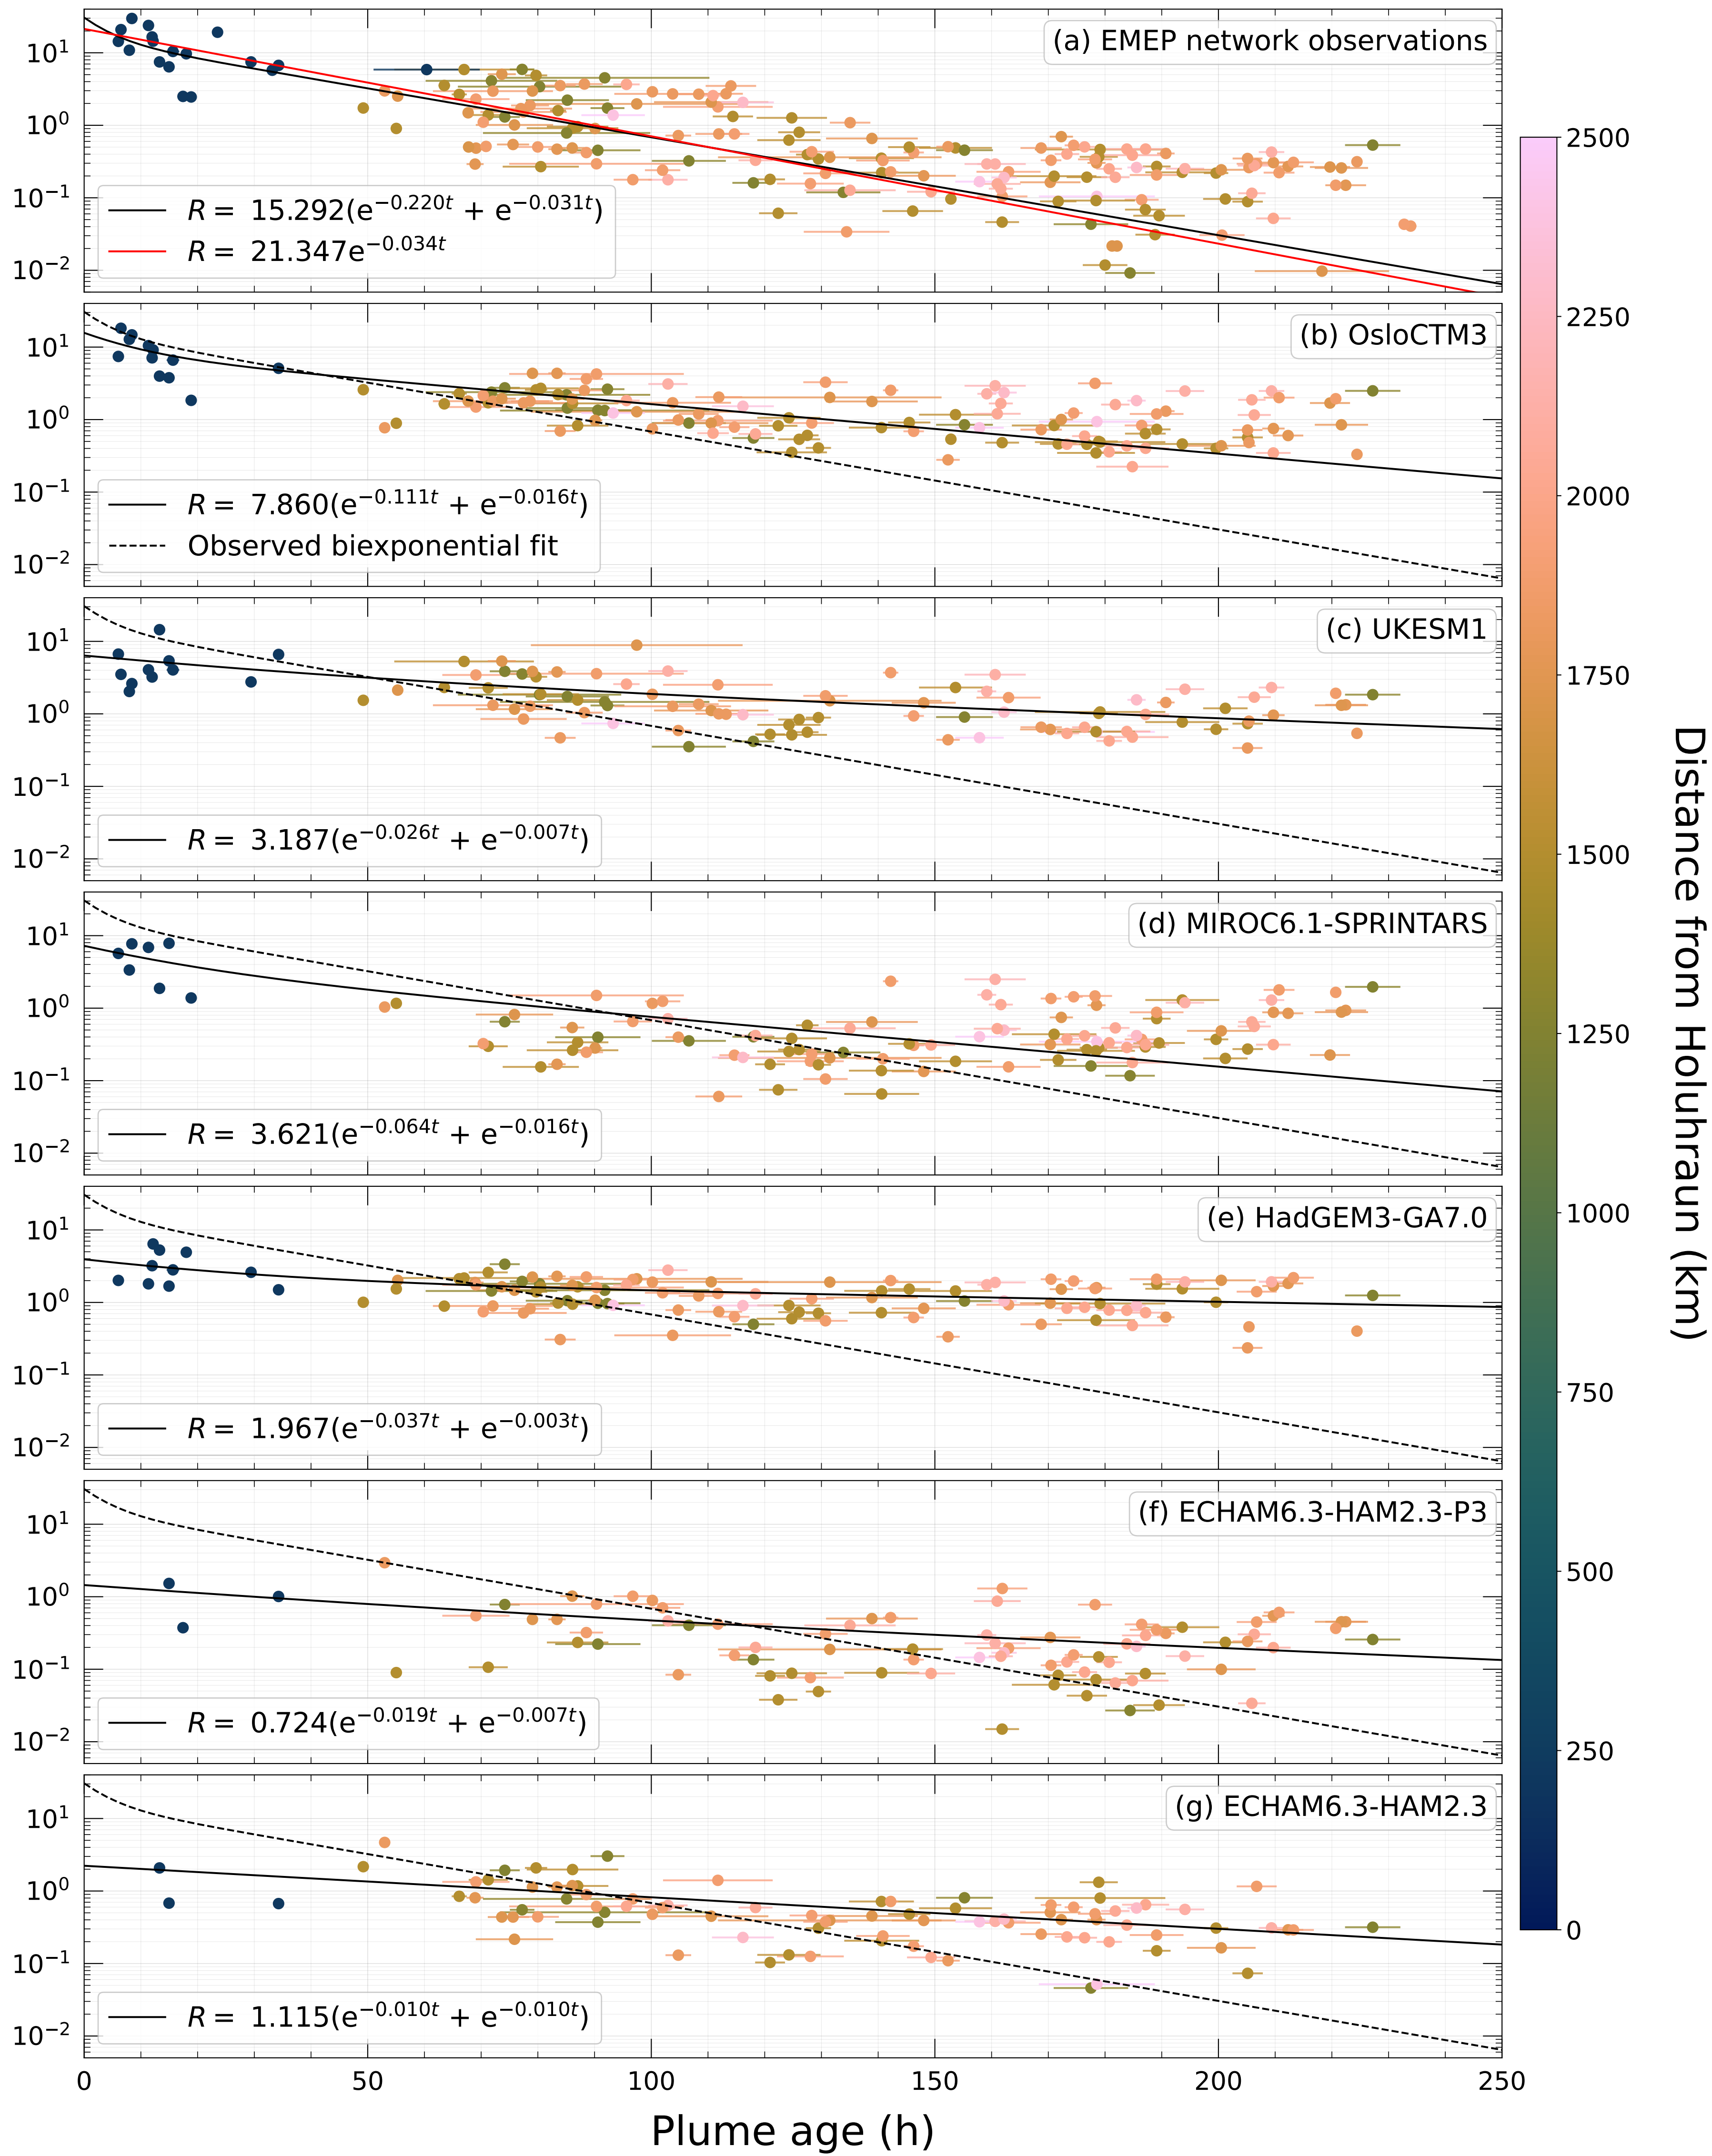

Supplement: Supplementary file 4 [file egusphere-2023-619-supplement.zip]
